# Supplementary material for: Retinoic Acid Induces Embryonic Stem Cells (ESCs) Transition to 2 Cell-Like State Through a Coordinated Expression of Dux and Duxbl1
Source: PubMed Central journal article supplement (PMC6979039; doi:10.3389/fcell.2019.00385), 2020-01-17
Supplement: Data_Sheet_1.pdf [file Data_Sheet_1.pdf]

## *Supplementary Material*

**Figure S1. RA induces Zscan4 protein expression in ESCs.**

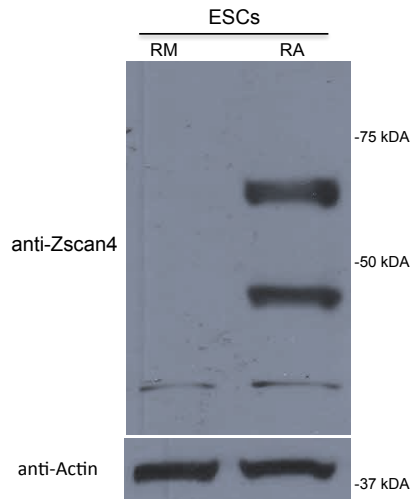

ESCs were cultured with 1.5  $\mu$ M RA for 72h. Following the treatment Zscan4 protein expression was assessed by Western blot analysis.

**Figure S2. RA signalling is required for Zscan4 induction.**

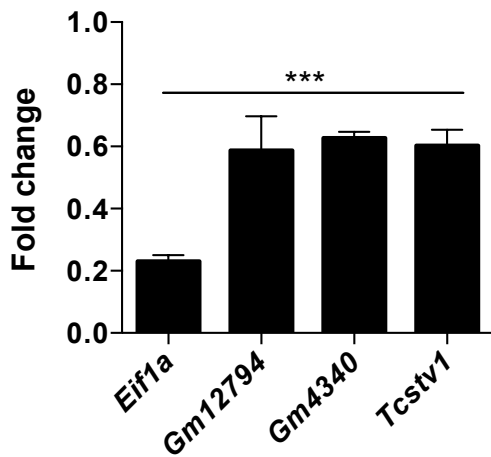

ESCs cells were cultured in VitA<sup>minus</sup> condition. Following treatment, *Eif1a*, *Gm12794*, *Gm4340* and *Tcstv1* expression levels were analysed by qPCR. The average and SEM of all the experiments were performed on the duplicate samples from three independent biological experiments and is shown: \*\*\*,  $p < .001$ , in a Student's *t* test.

Figure S3 Validation of Zscan4\_LNGFR ESCs line

A

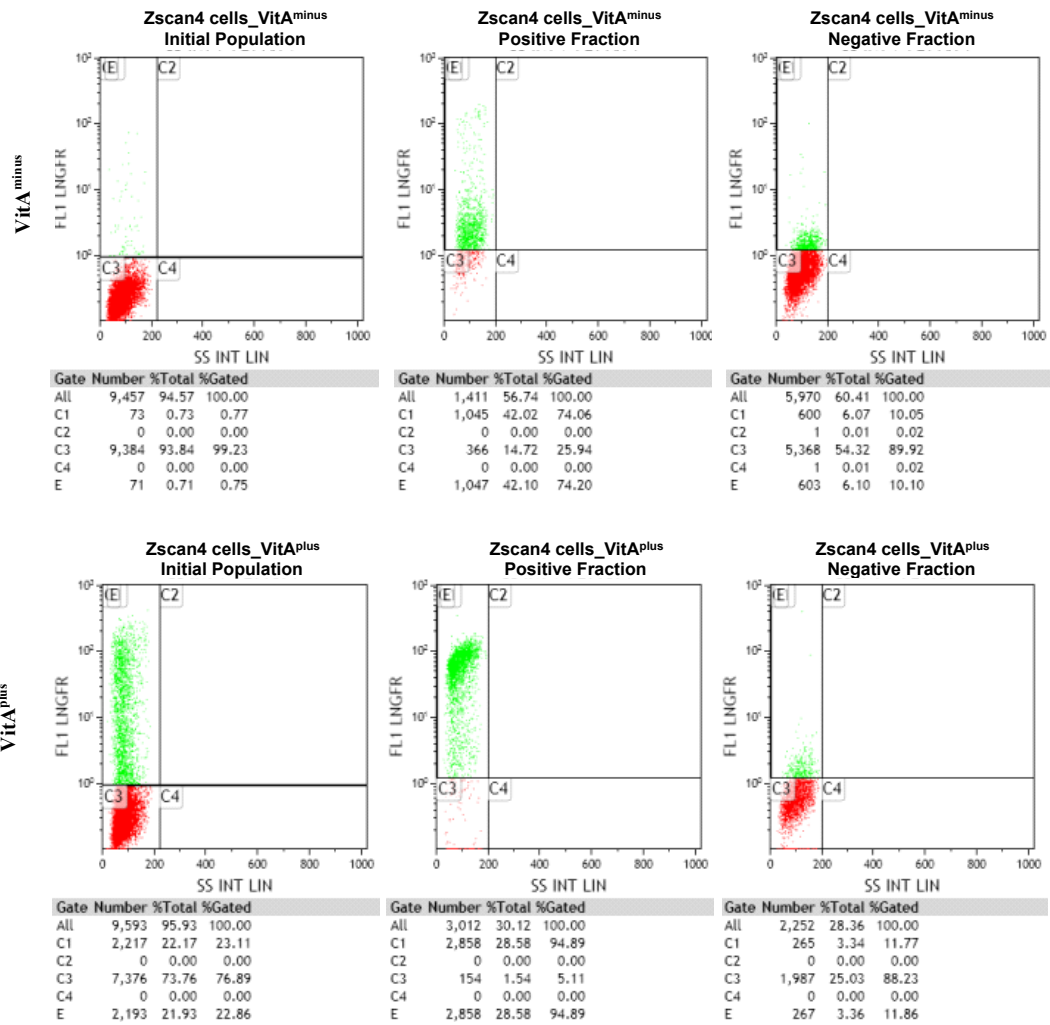

B

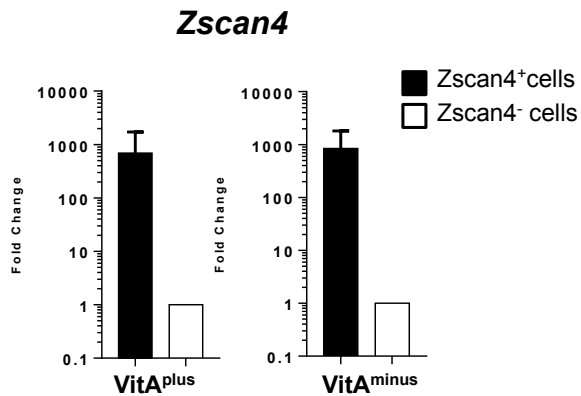

C

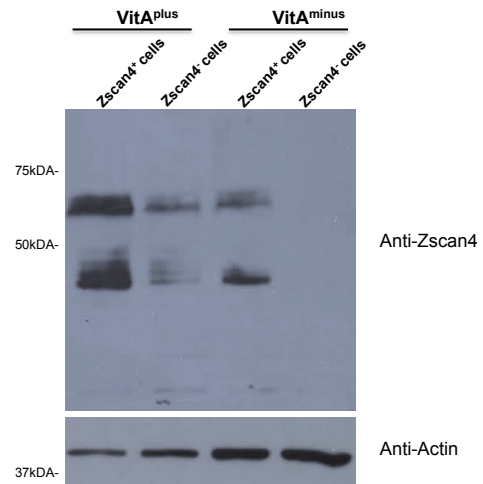

ESCs were cultured in VitA<sup>plus</sup> medium for 72h. After the treatment the cells were immunomagnetically separated through AutoMACs proseparator (Miltenyi Biotec) and analyzed by cytofluorimetry to validate the efficiency of separation (A). Furthermore, qPCR (B) and western blot analyses (C) were performed to confirm the Zscan4 enrichment in LNGFR positive cell fraction.

### Supplementary video

The video describes a time lapse of ESCs expressing GFP under the control of Zscan4 promoter. Upon RA treatment, Zscan4 induction leads to an increase of fluorescent cells.

**Figure S4. Global regulatory network from a collection of ESCs gene expression profiles**

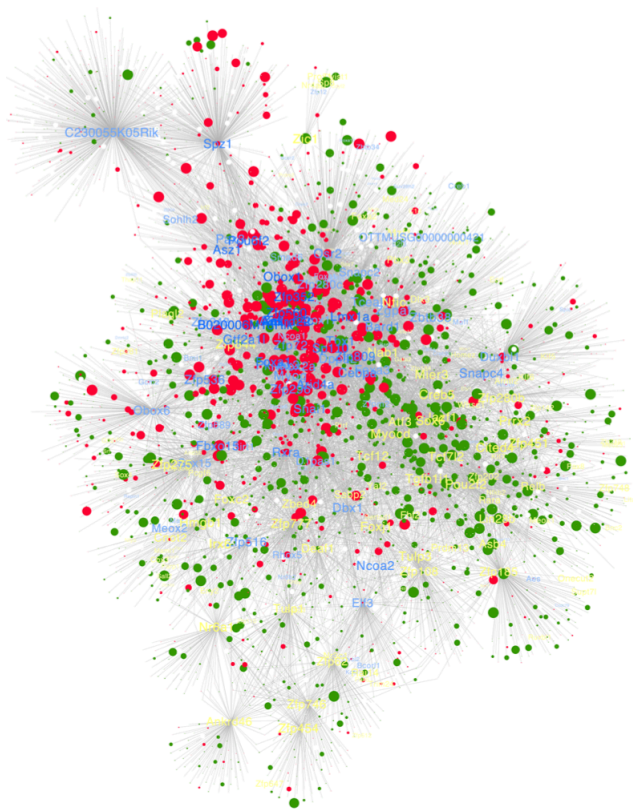

Global gene network reconstructed with an information theoretical inference approach from a collection of 754 mouse ESCs specific gene expression profiles. An over-expression in RA-Zscan4<sup>+</sup> is showed in red compared to RA-Zscan4<sup>-</sup> which is showed in green.

**Figure S5. Duxbl1 binds Zscan4 promoter.**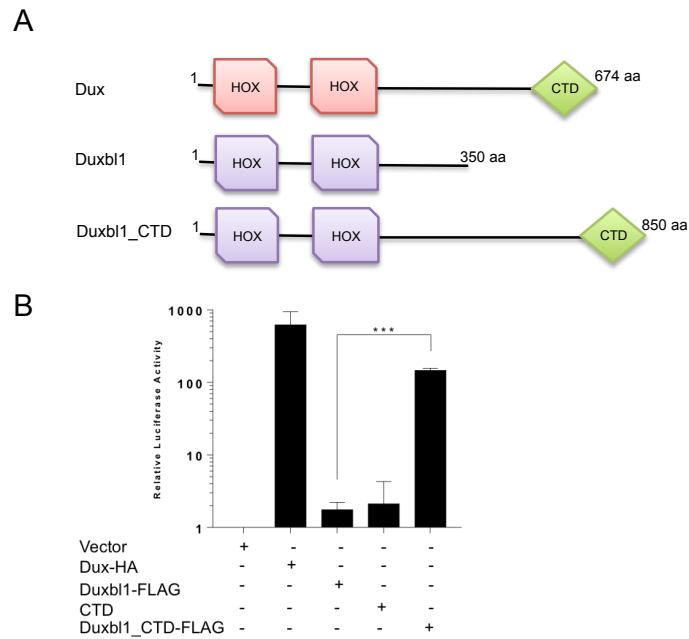

**A.** The transactivation domain, CTD, placed at C-term of Dux, was added to Duxbl1 protein.  
**B.** HEK293T cells with Luciferase-reporter gene under Zscan4 promoter regulation were transiently transfected with: control Vector, or Dux-HA, Duxbl1-Flag or with Duxbl1\_CTD-Flag. Data shown represent relative luciferase activity normalized against  $\beta$ -galactosidase activity. The average and SEM of all the experiments were performed on three independent biological experiments and are shown: \*\*,  $p < .01$ , \*\*\*,  $p < .001$ , in a Student's *t* test.

**Figure S6. ESC<sup>Duxbl1-Flag</sup> transgenic cell lines.**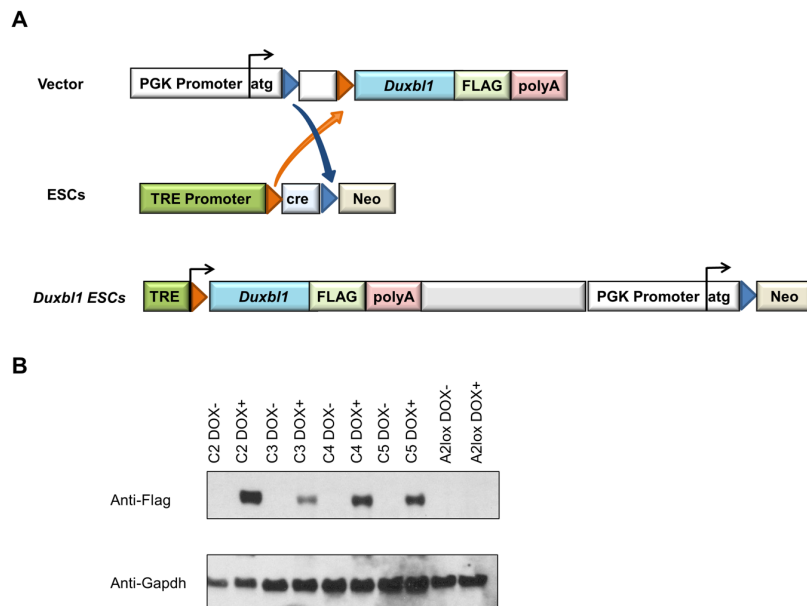

(A) Schematic representation of construct *Duxbl1-Flag*, DOX-inducible, used for ESCs transgenic lines generation. (B) Western blot assay of ESC<sup>Duxbl1-Flag</sup> cells DOX-inducible for system validation, using anti-Flag and anti-Gapdh antibodies.

Figure S7. *Duxbl1* ectopic characterization.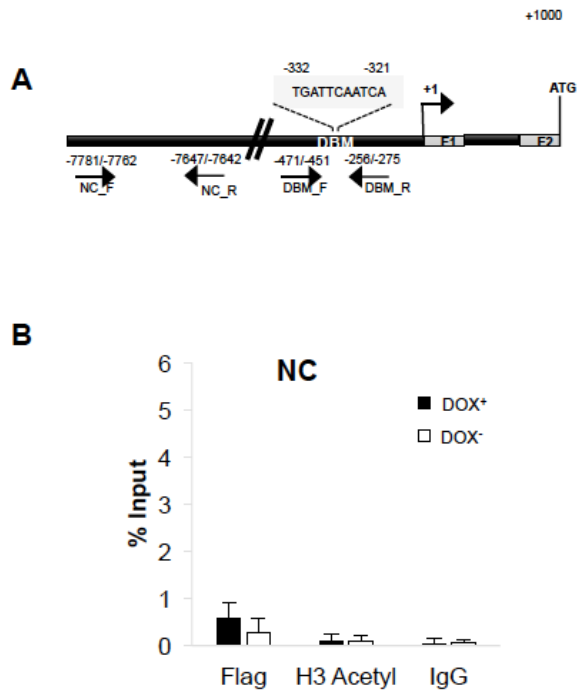

(A) Schematic Zscan4 sequence of the putative DBM (within the previously identified RA responsive region) and primers position used for ChIP assay are indicated. (B) *Duxbl1* not binds Zscan4 promoter away from DBM. ES<sup>*Duxbl1*-Flag</sup> cells were cultured with or without DOX for 72 hours and analysed by ChIP assay as Negative control of ChIP experiment indicated in Figure 6D. The average and SEM of all the experiments were performed on three independent biological experiments and are shown: \*\*,  $p < .01$ \*\*\*,  $p < .001$  in a Student's *t* test.

**Table S1. Analysis of Canonical RARE motifs**

| DR-type | sequence name | start | end  | strand | p-value   | q-value | matched sequence   |
|---------|---------------|-------|------|--------|-----------|---------|--------------------|
| DR-5    | Gm13119       | 1716  | 1732 | +      | 9,13E-07  | 0,099   | AGTTCAAATTTAGGTCA  |
| DR-2    | Dnah9         | 1130  | 1143 | -      | 8,92E-07  | 0,0716  | AGTTCATGAGTTCA     |
| DR-5    | BC080695      | 1725  | 1741 | +      | 8,82E-07  | 0,099   | AGTTCAAACCTTAGGTCA |
| DR-1    | Crabp2        | 618   | 630  | -      | 8,16E-06  | 0,078   | AGGGCAGAGGTCA      |
| DR-5    | Cyp26a1       | 15    | 31   | -      | 7,77E-07  | 0,004   | AGTTCACCCAAAGTTCA  |
| DR-2    | Got2          | 1349  | 1362 | +      | 7,68E-07  | 0,0986  | AGGTCATGAGTTCA     |
| DR-2    | Mest          | 2270  | 2283 | -      | 7,68E-07  | 0,0716  | AGTTCAGAGGTTC      |
| DR-1    | Tmem189       | 2247  | 2259 | -      | 6,84E-07  | 0,0731  | AGGTCAAAGGTCA      |
| DR-1    | Prex2         | 1734  | 1746 | -      | 6,84E-07  | 0,0731  | AGGTCATAGGTCA      |
| DR-1    | Ino80c        | 62    | 74   | +      | 6,84E-07  | 0,0731  | AGGTCAAGGTTC       |
| DR-2    | Crabp2        | 1127  | 1140 | +      | 5,14E-07  | 0,005   | AGTTCACCAGGTCA     |
| DR-2    | B020004J07Rik | 2386  | 2399 | +      | 5,14E-07  | 0,0825  | GGTTCAGAGGTTC      |
| DR-2    | AA986860      | 2382  | 2395 | +      | 5,14E-07  | 0,0825  | GGTTCAGAGGTTC      |
| DR-2    | Tdpoz5        | 445   | 458  | -      | 5,14E-07  | 0,0825  | AGGTCAGGAGTTCA     |
| DR-2    | Il17rd        | 476   | 489  | -      | 5,14E-07  | 0,0716  | AGGTCAGGAGTTCA     |
| DR-5    | Rarb          | 15    | 56   | +      | 5,00 e-07 | 0,003   | GGTTCACCGAAAGTTCA  |
| DR-5    | Csn3          | 405   | 421  | -      | 4,62E-08  | 0,011   | GGGTCACCTGCAGGTCA  |
| DR-5    | Mest          | 2353  | 2369 | -      | 3,49E-07  | 0,0414  | GGGTCAGAGGAAGTTCA  |
| DR-3    | Drd2          | 314   | 328  | -      | 2,95E-05  | 0,113   | GGGTCACCCTGGCCA    |
| DR-2    | Mreg          | 1270  | 1283 | +      | 2,36E-07  | 0,0825  | GGTTCAGAGGGTCA     |
| DR-2    | Hoxb1         | 1629  | 1642 | -      | 1,65E-05  | 0,081   | AGGGCAAGAGTTCA     |
| DR-2    | Stra8         | 300   | 287  | +      | 1,65E-05  | 0,019   | GGGTGAAAAGGTCA     |
| DR-5    | Prkch         | 598   | 614  | -      | 1,53E-07  | 0,05    | GGGTCATCCCAGGTTC   |
| DR-3    | Csn3          | 416   | 430  | -      | 1,41E-07  | 0,017   | AGGTCACCAGGGTCA    |
| DR-3    | Ackr3         | 1645  | 1659 | +      | 1,41E-07  | 0,017   | AGGTCAGGCAGGTCA    |
| DR-1    | Apol7b        | 1183  | 1195 | -      | 1,21E-07  | 0,0259  | GGGTCAAGGGTCA      |
| DR-1    | 1700109H08Rik | 981   | 993  | +      | 1,21E-07  | 0,0259  | GGGTCACAGGTCA      |
| DR-1    | 4930488B22Rik | 52    | 64   | -      | 1,21E-07  | 0,0259  | GGGTCAAGGGTCA      |
| DR-1    | Pla2g2a       | 446   | 458  | +      | 1,21E-07  | 0,0293  | AGGTCAGGGTCA       |

**Table S2. List of Master Regulators**

| <b>Master Regulator</b> | <b>p.value</b> | <b>FDR</b> | <b>ES</b>  | <b>NES</b> | <b>size</b> |
|-------------------------|----------------|------------|------------|------------|-------------|
| Zfp560                  | 0.000183385    | 0.0041021  | 0.86564392 | 2.85603522 | 74          |
| Ankrd22                 | 0.000179986    | 0.0041021  | 0.85853053 | 2.88472886 | 81          |
| Zfp352                  | 0.000167504    | 0.0041021  | 0.85120576 | 3.15650269 | 158         |
| B020006M18Rik           | 0.000186359    | 0.0041021  | 0.8442614  | 2.71178247 | 62          |
| Obox1                   | 0.000164447    | 0.0041021  | 0.81211733 | 3.04726253 | 173         |
| Zscan4c                 | 0.000149388    | 0.0041021  | 0.7921011  | 3.24156322 | 366         |
| Lmx1a                   | 0.000161891    | 0.0041021  | 0.77326238 | 2.95387844 | 200         |
| Pou6f2                  | 0.000173581    | 0.0041021  | 0.77167242 | 2.72727753 | 112         |
| Asz1                    | 0.000169062    | 0.0041021  | 0.76379968 | 2.79472032 | 144         |
| Nelfa                   | 0.000157803    | 0.0041021  | 0.75377359 | 2.95227565 | 244         |
| Csrnp2                  | 0.00015873     | 0.0041021  | 0.71367173 | 2.77490062 | 228         |
| Foxa1                   | 0.000169062    | 0.0041021  | 0.7123334  | 2.60640675 | 144         |
| Sp110                   | 0.000150353    | 0.0041021  | 0.69376765 | 2.81941616 | 344         |
| Gtf2a11                 | 0.000161316    | 0.0041021  | 0.68360789 | 2.61853141 | 204         |
| Zfp809                  | 0.000163613    | 0.0041021  | 0.65783622 | 2.4885116  | 186         |
| Spz1                    | 0.00014941     | 0.0041021  | 0.65055644 | 2.66626808 | 372         |
| Arid4a                  | 0.000168776    | 0.0041021  | 0.64776656 | 2.37596137 | 147         |
| Tbx1                    | 0.000165481    | 0.0041021  | 0.6385288  | 2.39049067 | 171         |
| Fbxo15                  | 0.000159413    | 0.0041021  | 0.60573206 | 2.34786192 | 223         |
| Pknox2                  | 0.000146284    | 0.0041021  | 0.5958041  | 2.48806773 | 457         |
| Arnt                    | 0.000147645    | 0.0041021  | 0.59138646 | 2.45119244 | 423         |
| Zfp296                  | 0.00015674     | 0.0041021  | 0.58773012 | 2.31359437 | 257         |
| Cebpa                   | 0.000156104    | 0.0041021  | 0.58711144 | 2.31775664 | 263         |
| Ncoa2                   | 0.000173641    | 0.0041021  | 0.57593693 | 2.03057978 | 110         |
| Osr2                    | 0.000143761    | 0.0041021  | 0.56526973 | 2.38700017 | 522         |
| Zfp72                   | 0.000158053    | 0.0041021  | 0.56488081 | 2.20516775 | 236         |
| Rhox2a                  | 0.000166306    | 0.0041021  | 0.56154884 | 2.0985916  | 169         |
| Snail                   | 0.000159949    | 0.0041021  | 0.56032203 | 2.16747494 | 221         |
| Rxra                    | 0.00015425     | 0.0041021  | 0.5598233  | 2.2357033  | 294         |
| Snape4                  | 0.000355872    | 0.00417009 | 0.55688842 | 1.90430096 | 90          |
| Zfp536                  | 0.000161812    | 0.0041021  | 0.55040094 | 2.10042728 | 196         |
| Bard1                   | 0.000160282    | 0.0041021  | 0.54187492 | 2.08437045 | 209         |
| Dbx1                    | 0.000168407    | 0.0041021  | 0.53306351 | 1.97024959 | 156         |
| Myog                    | 0.000166667    | 0.0041021  | 0.5129365  | 1.91451141 | 167         |
| Meox2                   | 0.000501672    | 0.00527044 | 0.49708232 | 1.84982991 | 163         |
| Dppa2                   | 0.000152253    | 0.0041021  | 0.495051   | 1.99715803 | 323         |
| Zfp516                  | 0.001028454    | 0.00800898 | 0.48724074 | 1.7645557  | 135         |
| Tceal1                  | 0.000667111    | 0.00622184 | 0.48700516 | 1.81642273 | 166         |
| Tfap2a                  | 0.000152858    | 0.0041021  | 0.485972   | 1.95555289 | 315         |
| Zbtb38                  | 0.000162101    | 0.0041021  | 0.48590201 | 1.8569527  | 201         |
| Zgpat                   | 0.000155521    | 0.0041021  | 0.48362188 | 1.91666275 | 272         |
| C230055K05Rik           | 0.000137722    | 0.0041021  | 0.48047309 | 2.07226326 | 678         |
| Foxa3                   | 0.000156814    | 0.0041021  | 0.47465759 | 1.8666114  | 251         |
| Sox15                   | 0.000154536    | 0.0041021  | 0.47016241 | 1.8778858  | 296         |



|         |             |            |            |            |      |
|---------|-------------|------------|------------|------------|------|
| Obox6   | 0.000159923 | 0.0041021  | 0.46963045 | 1.8174395  | 222  |
| Spib    | 0.000490838 | 0.00522575 | 0.46695637 | 1.76643713 | 186  |
| Zfp280c | 0.000149321 | 0.0041021  | 0.46458689 | 1.89746009 | 359  |
| Sox17   | 0.000318573 | 0.0041021  | 0.46410743 | 1.79434199 | 218  |
| Thrb    | 0.000324992 | 0.0041021  | 0.45433653 | 1.73294979 | 197  |
| D1pas1  | 0.000153681 | 0.0041021  | 0.45206913 | 1.80953137 | 300  |
| Duxbl1  | 0.000156104 | 0.0041021  | 0.44460685 | 1.855187   | 263  |
| Sohlh2  | 0.000151722 | 0.0041021  | 0.43651036 | 1.76459462 | 328  |
| Elf3    | 0.000476493 | 0.00515976 | 0.43228473 | 1.835257   | 234  |
| Gtf2e1  | 0.000784683 | 0.00699708 | 0.42717921 | 1.67875976 | 250  |
| Aire    | 0.000140706 | 0.0041021  | 0.42603938 | 1.81671308 | 584  |
| Trefl   | 0.001107069 | 0.00845357 | 0.42178257 | 1.65063516 | 243  |
| Mtf2    | 0.000462677 | 0.00515976 | 0.4119236  | 1.64164384 | 286  |
| Rhox12  | 0.001237241 | 0.00886932 | 0.40473324 | 1.60974161 | 283  |
| Rhox5   | 0.000131113 | 0.0041021  | 0.40351181 | 1.77506801 | 906  |
| Fgfbp1  | 0.000919118 | 0.00746096 | 0.39634356 | 1.58766996 | 301  |
| Zfp689  | 0.000448029 | 0.00511873 | 0.39092599 | 1.59558682 | 356  |
| Zfp790  | 0.000915751 | 0.00746096 | 0.38844442 | 1.56361027 | 317  |
| Tbx3    | 0.000133032 | 0.0041021  | 0.38828628 | 1.69953094 | 828  |
| Vav1    | 0.00089579  | 0.0074432  | 0.38440527 | 1.56728572 | 353  |
| Zfpm2   | 0.00043573  | 0.00505134 | 0.36732206 | 1.54136873 | 486  |
| Egr2    | 0.000133583 | 0.0041021  | 0.36366942 | 1.58927479 | 803  |
| Carf    | 0.000117385 | 0.0041021  | 0.30040783 | 1.37134759 | 1837 |
| Npm1    | 0.001311762 | 0.0093668  | -0.2653889 | -1.2797224 | 963  |
| Rcor1   | 0.000825764 | 0.00710457 | -0.2739702 | -1.3140841 | 873  |
| Tcf15   | 0.000439367 | 0.00505134 | -0.2746396 | -1.3264977 | 981  |
| Wwtr1   | 0.001203369 | 0.00870762 | -0.2795066 | -1.3364423 | 822  |
| Cnbp    | 0.001342282 | 0.00943981 | -0.2827527 | -1.4384202 | 3477 |
| Hdac11  | 0.00034638  | 0.0041021  | -0.3147684 | -1.4667773 | 589  |
| Hey1    | 0.000944287 | 0.00757086 | -0.3150081 | -1.4401608 | 456  |
| Med27   | 0.000926498 | 0.00746096 | -0.3165394 | -1.4353694 | 413  |
| Aatf    | 0.000343761 | 0.0041021  | -0.3167918 | -1.4711386 | 567  |
| Smad5   | 0.000926212 | 0.00746096 | -0.3176136 | -1.4397752 | 411  |
| Zmynd8  | 0.000331895 | 0.0041021  | -0.3177115 | -1.4691002 | 527  |
| Zfp322a | 0.000638978 | 0.00599001 | -0.317837  | -1.4596309 | 480  |
| Pou3f1  | 0.001209921 | 0.00870762 | -0.3180454 | -1.4270876 | 375  |
| Pou3f3  | 0.000324465 | 0.0041021  | -0.3202207 | -1.4744853 | 497  |
| Cebpb   | 0.000926212 | 0.00746096 | -0.3204151 | -1.4524746 | 411  |
| Polr2i  | 0.000625195 | 0.00589102 | -0.3266667 | -1.486489  | 434  |
| Ankrd52 | 0.000919963 | 0.00746096 | -0.3275477 | -1.4845961 | 409  |
| Zkscan8 | 0.000324465 | 0.0041021  | -0.3285312 | -1.5124593 | 496  |
| Zbtb4   | 0.000347826 | 0.0041021  | -0.3294438 | -1.5395974 | 609  |
| Hmga2   | 0.00062054  | 0.00587745 | -0.3318477 | -1.5073136 | 421  |
| Sall3   | 0.001207365 | 0.00870762 | -0.3357698 | -1.500549  | 360  |
| Usf1    | 0.000346861 | 0.0041021  | -0.3400885 | -1.5843645 | 588  |
| Ahrr    | 0.00120012  | 0.00870762 | -0.3403981 | -1.5146452 | 346  |

|         |             |            |            |            |     |
|---------|-------------|------------|------------|------------|-----|
| Nkrf    | 0.000608088 | 0.0057895  | -0.3407837 | -1.5286167 | 374 |
| Zfp770  | 0.000907716 | 0.00746096 | -0.3423367 | -1.5269018 | 354 |
| Pitx2   | 0.000334001 | 0.0041021  | -0.3426162 | -1.584426  | 531 |
| Ruvbl1  | 0.000345781 | 0.0041021  | -0.3441332 | -1.6017514 | 583 |
| Gli3    | 0.000309693 | 0.0041021  | -0.3445926 | -1.5657926 | 423 |
| Gcfc2   | 0.000314663 | 0.0041021  | -0.345368  | -1.5725102 | 438 |
| Zfp606  | 0.001139277 | 0.0085004  | -0.3454963 | -1.5146305 | 298 |
| Tead3   | 0.000327654 | 0.0041021  | -0.3461714 | -1.5976935 | 514 |
| Lbh     | 0.001444669 | 0.00996549 | -0.3465619 | -1.5267036 | 313 |
| Sox10   | 0.000303582 | 0.0041021  | -0.3477813 | -1.5654283 | 385 |
| Cbfa2t2 | 0.00113701  | 0.0085004  | -0.3478021 | -1.5199407 | 287 |
| Hmg20a  | 0.000300933 | 0.0041021  | -0.3494509 | -1.5625211 | 361 |
| Dlx4    | 0.001132824 | 0.0085004  | -0.3501141 | -1.5351744 | 296 |
| Pthf1   | 0.000336247 | 0.0041021  | -0.3502734 | -1.6211074 | 537 |
| Atf7    | 0.000591541 | 0.00566145 | -0.3508995 | -1.5591926 | 339 |
| Smad3   | 0.000302663 | 0.0041021  | -0.3511533 | -1.5653923 | 353 |
| Phox2a  | 0.001451379 | 0.00997414 | -0.3512125 | -1.5433043 | 306 |
| Cdyl    | 0.001398601 | 0.00975818 | -0.3550445 | -1.5388442 | 267 |
| Zfp444  | 0.000300481 | 0.0041021  | -0.3553111 | -1.5832919 | 351 |
| Ikzf2   | 0.001136041 | 0.0085004  | -0.3554481 | -1.5581758 | 297 |
| Zfp281  | 0.001109878 | 0.00845357 | -0.3562668 | -1.5398311 | 260 |
| Ankrd42 | 0.001156738 | 0.0085608  | -0.3567961 | -1.5779729 | 321 |
| Hmgal   | 0.000344709 | 0.0041021  | -0.3584988 | -1.6678077 | 578 |
| Dppa3   | 0.001342642 | 0.00943981 | -0.3598342 | -1.5260866 | 218 |
| Vax1    | 0.001105278 | 0.00845357 | -0.3599861 | -1.5561679 | 259 |
| Ckap5   | 0.000866802 | 0.00723522 | -0.3600736 | -1.5899861 | 318 |
| Gabpb1  | 0.000326797 | 0.0041021  | -0.3609975 | -1.6657607 | 511 |
| Zfp367  | 0.00107904  | 0.00832272 | -0.3618728 | -1.5433496 | 229 |
| Wiz     | 0.001333333 | 0.00943981 | -0.3621534 | -1.5381396 | 221 |
| Glis1   | 0.000321027 | 0.0041021  | -0.362856  | -1.6641148 | 474 |
| Asb6    | 0.000302755 | 0.0041021  | -0.3633703 | -1.6357857 | 384 |
| Msrb2   | 0.001360544 | 0.00952902 | -0.3635246 | -1.555034  | 236 |
| Rora    | 0.000809935 | 0.00710457 | -0.3638467 | -1.5527703 | 230 |
| Lmo1    | 0.001119194 | 0.00848916 | -0.3650424 | -1.5818739 | 266 |
| Whsc1   | 0.000831716 | 0.00710457 | -0.3653321 | -1.5753449 | 254 |
| Irf1    | 0.000580552 | 0.00558552 | -0.3658325 | -1.6075479 | 306 |
| Pawr    | 0.000810373 | 0.00710457 | -0.3664195 | -1.56116   | 228 |
| Crxos   | 0.000319489 | 0.0041021  | -0.3665357 | -1.683274  | 480 |
| Gbx1    | 0.00057971  | 0.00558552 | -0.3679344 | -1.623892  | 317 |
| Atf1    | 0.001045205 | 0.00809591 | -0.3683806 | -1.5520542 | 202 |
| Nfxl1   | 0.000322581 | 0.0041021  | -0.3689366 | -1.6981778 | 494 |
| Zc3h8   | 0.001324153 | 0.00941849 | -0.3695989 | -1.5602055 | 207 |
| Psmc3   | 0.000827586 | 0.00710457 | -0.3701048 | -1.5936262 | 251 |
| Sox13   | 0.000857633 | 0.00719153 | -0.3709152 | -1.6221687 | 292 |
| Smarb1  | 0.000856653 | 0.00719153 | -0.371071  | -1.6225866 | 290 |
| Eny2    | 0.00029753  | 0.0041021  | -0.3711622 | -1.6500817 | 343 |

|          |             |            |            |            |     |
|----------|-------------|------------|------------|------------|-----|
| Batf3    | 0.001029601 | 0.00800898 | -0.3712534 | -1.5552624 | 190 |
| Btaf1    | 0.000857633 | 0.00719153 | -0.3715485 | -1.6249384 | 292 |
| Msx3     | 0.000852031 | 0.00719153 | -0.372477  | -1.6328252 | 297 |
| Sp8      | 0.000826674 | 0.00710457 | -0.3737249 | -1.6066309 | 247 |
| Arid3a   | 0.000303582 | 0.0041021  | -0.3738895 | -1.6829464 | 385 |
| Sap30bp  | 0.000544514 | 0.00549929 | -0.3739096 | -1.6007113 | 237 |
| Supt16   | 0.000535045 | 0.00546404 | -0.3747789 | -1.5949016 | 225 |
| Klf6     | 0.00030175  | 0.0041021  | -0.3753557 | -1.6700112 | 347 |
| Kdm5b    | 0.000826674 | 0.00710457 | -0.376026  | -1.6173042 | 248 |
| Tbl1x    | 0.000302206 | 0.0041021  | -0.3773066 | -1.6849108 | 358 |
| Klf10    | 0.000779626 | 0.00699708 | -0.3784438 | -1.5905497 | 197 |
| Pax8     | 0.000826674 | 0.00710457 | -0.3792984 | -1.6360942 | 253 |
| Bdp1     | 0.001028278 | 0.00800898 | -0.3794764 | -1.5828248 | 186 |
| Eid1     | 0.000783699 | 0.00699708 | -0.3796166 | -1.5910883 | 194 |
| Zfp637   | 0.000525901 | 0.00546149 | -0.379721  | -1.6011232 | 204 |
| Zfp354c  | 0.000288934 | 0.0041021  | -0.3812487 | -1.6795088 | 313 |
| Zfp763   | 0.000342583 | 0.0041021  | -0.3815229 | -1.768235  | 551 |
| Ms13     | 0.000828043 | 0.00710457 | -0.3821614 | -1.6508772 | 256 |
| Zkscan14 | 0.000542446 | 0.00549929 | -0.3825204 | -1.6381184 | 238 |
| Gatad1   | 0.001024066 | 0.00800898 | -0.3827828 | -1.5959492 | 185 |
| Tcf7     | 0.000783699 | 0.00699708 | -0.3835216 | -1.6074553 | 194 |
| Tcf15    | 0.00056101  | 0.00552309 | -0.3851442 | -1.6703418 | 269 |
| Zfp30    | 0.000288934 | 0.0041021  | -0.3853158 | -1.6920418 | 304 |
| Meis3    | 0.000564653 | 0.00552309 | -0.3857185 | -1.678246  | 277 |
| Fhl2     | 0.0003427   | 0.0041021  | -0.3861249 | -1.7927147 | 562 |
| Skp1a    | 0.000768246 | 0.00698683 | -0.3871843 | -1.6055396 | 178 |
| Dlx3     | 0.000528821 | 0.00546149 | -0.3875968 | -1.6347724 | 205 |
| Satb1    | 0.000294291 | 0.0041021  | -0.3892142 | -1.7293991 | 336 |
| Zfp764   | 0.00056802  | 0.00552309 | -0.3905858 | -1.7073871 | 288 |
| Zfp53    | 0.000532907 | 0.00546404 | -0.3910546 | -1.6544649 | 213 |
| Clock    | 0.000565931 | 0.00552309 | -0.3912352 | -1.7042857 | 280 |
| Wtip     | 0.001020408 | 0.00800898 | -0.3915727 | -1.6278194 | 181 |
| Yaf2     | 0.000317259 | 0.0041021  | -0.3923946 | -1.7938069 | 460 |
| Asb8     | 0.00056802  | 0.00552309 | -0.3925447 | -1.7159503 | 288 |
| Etv4     | 0.000562114 | 0.00552309 | -0.3926924 | -1.7037314 | 270 |
| Zfp202   | 0.000565611 | 0.00552309 | -0.3928921 | -1.714969  | 283 |
| Thrap3   | 0.000259875 | 0.0041021  | -0.3941092 | -1.6563897 | 197 |
| Zscan21  | 0.000510595 | 0.00533353 | -0.3942926 | -1.630262  | 175 |
| Ikzf4    | 0.0002574   | 0.0041021  | -0.3954395 | -1.6565831 | 190 |
| Per2     | 0.00027027  | 0.0041021  | -0.3959626 | -1.70037   | 240 |
| Zfp236   | 0.000270124 | 0.0041021  | -0.3986381 | -1.6984302 | 228 |
| Pbx3     | 0.000310078 | 0.0041021  | -0.398711  | -1.8076258 | 415 |
| Meis2    | 0.000259202 | 0.0041021  | -0.3998661 | -1.6824379 | 198 |
| Zeb2     | 0.000992063 | 0.00788475 | -0.4005172 | -1.6409216 | 162 |
| Cers2    | 0.000289519 | 0.0041021  | -0.4008288 | -1.7604006 | 305 |
| Bach2    | 0.000280112 | 0.0041021  | -0.400853  | -1.7433893 | 275 |

|         |             |            |            |            |     |
|---------|-------------|------------|------------|------------|-----|
| Dip2a   | 0.000255363 | 0.0041021  | -0.4016206 | -1.6719963 | 183 |
| Mef2a   | 0.000286123 | 0.0041021  | -0.4016815 | -1.7629448 | 300 |
| Hsf5    | 0.000257003 | 0.0041021  | -0.4034952 | -1.6848737 | 187 |
| Btg2    | 0.000321543 | 0.0041021  | -0.403505  | -1.8480446 | 470 |
| Med20   | 0.000265534 | 0.0041021  | -0.4038901 | -1.7048881 | 208 |
| Zfp341  | 0.000275482 | 0.0041021  | -0.4044651 | -1.7411427 | 250 |
| Tada2a  | 0.000304878 | 0.0041021  | -0.4047344 | -1.8297567 | 398 |
| Taf9    | 0.000275482 | 0.0041021  | -0.4061764 | -1.7485094 | 250 |
| Nkx6-2  | 0.00049456  | 0.00522575 | -0.4097693 | -1.6733895 | 159 |
| Etv2    | 0.000261643 | 0.0041021  | -0.4105843 | -1.7234355 | 196 |
| Mycbp   | 0.000259067 | 0.0041021  | -0.4113011 | -1.7238701 | 192 |
| Bhlhe40 | 0.000300481 | 0.0041021  | -0.4117436 | -1.8411895 | 362 |
| Nr3c1   | 0.001201057 | 0.00870762 | -0.4143205 | -1.6485029 | 133 |
| Tbpl1   | 0.000245038 | 0.0041021  | -0.4160157 | -1.6955831 | 155 |
| Cited2  | 0.000493097 | 0.00522575 | -0.4184706 | -1.7008574 | 153 |
| Tsc22d4 | 0.00026441  | 0.0041021  | -0.4194408 | -1.7690815 | 205 |
| Hivep1  | 0.000728863 | 0.00669434 | -0.4219729 | -1.6905546 | 140 |
| Mzf1    | 0.001412429 | 0.00979615 | -0.4237466 | -1.6451664 | 115 |
| Pou5f1  | 0.001414761 | 0.00979615 | -0.4245918 | -1.6396193 | 112 |
| Kcnip3  | 0.000279486 | 0.0041021  | -0.4245941 | -1.8456456 | 273 |
| Pias2   | 0.000957854 | 0.0076461  | -0.4247238 | -1.6866251 | 132 |
| Prdm8   | 0.000270416 | 0.0041021  | -0.4248751 | -1.8152042 | 233 |
| Hmgb2   | 0.000261506 | 0.0041021  | -0.4268574 | -1.7993384 | 203 |
| Rai14   | 0.000248016 | 0.0041021  | -0.4278188 | -1.7527764 | 162 |
| Fos     | 0.000247097 | 0.0041021  | -0.4282642 | -1.7466368 | 157 |
| Zfp707  | 0.000732422 | 0.00669434 | -0.42922   | -1.7223567 | 142 |
| Six1    | 0.000304044 | 0.0041021  | -0.4298751 | -1.9282441 | 374 |
| Rad54l2 | 0.000717875 | 0.0066613  | -0.430156  | -1.7031085 | 129 |
| Zfp646  | 0.001175641 | 0.00866561 | -0.4303005 | -1.6595653 | 111 |
| Yeats2  | 0.000290192 | 0.0041021  | -0.430675  | -1.9045433 | 322 |
| Tanc2   | 0.000722717 | 0.00667236 | -0.4331736 | -1.7257675 | 134 |
| Ascl1   | 0.001183712 | 0.00869006 | -0.4334561 | -1.696574  | 121 |
| Preb    | 0.000252589 | 0.0041021  | -0.4336451 | -1.7876518 | 171 |
| Cnot2   | 0.000479846 | 0.00515976 | -0.433742  | -1.7328761 | 135 |
| Ilf2    | 0.00047081  | 0.00515976 | -0.4354731 | -1.6906941 | 115 |
| Relb    | 0.000255297 | 0.0041021  | -0.4356855 | -1.801407  | 175 |
| Zfp182  | 0.000272851 | 0.0041021  | -0.4357678 | -1.8729535 | 244 |
| Hdac7   | 0.000282805 | 0.0041021  | -0.4369744 | -1.9073878 | 283 |
| Ankrd46 | 0.000259875 | 0.0041021  | -0.4373562 | -1.8381512 | 197 |
| Plagl2  | 0.000255037 | 0.0041021  | -0.4380566 | -1.8087628 | 173 |
| Rest    | 0.000272554 | 0.0041021  | -0.4383517 | -1.8852166 | 245 |
| Stat1   | 0.001152074 | 0.0085608  | -0.4388701 | -1.6573139 | 97  |
| Meis1   | 0.000479846 | 0.00515976 | -0.4389384 | -1.7328981 | 127 |
| Ccnt2   | 0.000261233 | 0.0041021  | -0.4391386 | -1.8405632 | 194 |
| Zfp593  | 0.000247525 | 0.0041021  | -0.4396989 | -1.7985044 | 160 |
| Zfp618  | 0.00026976  | 0.0041021  | -0.4446111 | -1.8962198 | 229 |

|         |             |            |            |            |     |
|---------|-------------|------------|------------|------------|-----|
| Asb4    | 0.000479386 | 0.00515976 | -0.4458411 | -1.7666752 | 130 |
| Nab1    | 0.000246245 | 0.0041021  | -0.4477259 | -1.8160878 | 151 |
| Lin28b  | 0.00047081  | 0.00515976 | -0.44797   | -1.7219438 | 109 |
| Fem1c   | 0.000461681 | 0.00515976 | -0.4483994 | -1.7076465 | 102 |
| Zfp422  | 0.000238095 | 0.0041021  | -0.4491685 | -1.761334  | 123 |
| Jun     | 0.000261506 | 0.0041021  | -0.4515832 | -1.9035655 | 203 |
| Deaf1   | 0.000239406 | 0.0041021  | -0.4519154 | -1.7765135 | 125 |
| Pura    | 0.000255363 | 0.0041021  | -0.4524316 | -1.8835287 | 183 |
| Atf3    | 0.000302572 | 0.0041021  | -0.4526012 | -2.018707  | 354 |
| Tulp3   | 0.000471587 | 0.00515976 | -0.4544326 | -1.7548539 | 112 |
| Tulp1   | 0.000241721 | 0.0041021  | -0.4562659 | -1.8266665 | 138 |
| Sowahc  | 0.000248016 | 0.0041021  | -0.4565787 | -1.8618031 | 158 |
| Zfp62   | 0.00023084  | 0.0041021  | -0.4583759 | -1.7456404 | 102 |
| Kat5    | 0.000233372 | 0.0041021  | -0.4590042 | -1.7597549 | 107 |
| Hmgb1   | 0.00023084  | 0.0041021  | -0.4634861 | -1.7530237 | 98  |
| Zfp185  | 0.000266738 | 0.0041021  | -0.4638876 | -1.9660672 | 215 |
| Zfp746  | 0.000233372 | 0.0041021  | -0.467024  | -1.7905014 | 107 |
| Foxj1   | 0.000238095 | 0.0041021  | -0.4692155 | -1.8399448 | 123 |
| Tef12   | 0.000267094 | 0.0041021  | -0.4792172 | -2.0341031 | 219 |
| Dmrtb1  | 0.000235405 | 0.0041021  | -0.4804951 | -1.8469667 | 109 |
| Zfp280b | 0.000234962 | 0.0041021  | -0.481801  | -1.8834243 | 119 |
| Rbfox2  | 0.000234028 | 0.0041021  | -0.4834656 | -1.8570864 | 108 |
| Tef7l2  | 0.000439271 | 0.00505134 | -0.4841321 | -1.7461745 | 73  |
| Tgfbli1 | 0.000301841 | 0.0041021  | -0.485418  | -2.1693245 | 360 |
| Zfp454  | 0.000452694 | 0.0051399  | -0.4862062 | -1.783513  | 82  |
| Mier3   | 0.00024728  | 0.0041021  | -0.4875338 | -1.9909591 | 159 |
| Zfp777  | 0.000266738 | 0.0041021  | -0.4950593 | -2.1049339 | 222 |
| Nfic    | 0.000240906 | 0.0041021  | -0.4963326 | -1.9860504 | 137 |
| Zfp644  | 0.000241721 | 0.0041021  | -0.4982898 | -1.9949097 | 138 |
| Pou2f2  | 0.000247341 | 0.0041021  | -0.5065967 | -2.0741214 | 161 |
| Jazf1   | 0.000235128 | 0.0041021  | -0.5084544 | -1.9609859 | 111 |
| Prrx2   | 0.000240906 | 0.0041021  | -0.5119004 | -2.048344  | 137 |
| Nr6a1   | 0.000239406 | 0.0041021  | -0.5166833 | -2.0311208 | 125 |
| Myocd   | 0.000239464 | 0.0041021  | -0.5265972 | -2.0911756 | 132 |
| Cited4  | 0.000218531 | 0.0041021  | -0.5330536 | -1.9187099 | 72  |
| Sox6    | 0.000259808 | 0.0041021  | -0.5409714 | -2.2770629 | 199 |
| Zfp451  | 0.000224921 | 0.0041021  | -0.5539263 | -2.0308343 | 81  |
| Creb5   | 0.000248633 | 0.0041021  | -0.5541833 | -2.2709822 | 163 |

**Table S3. Zscan4c Promoter analysis**

| <i>pattern name</i> | <i>start</i> | <i>end</i> | <i>normalized binding score</i> | <i>p.value</i> | <i>matched sequence</i> |
|---------------------|--------------|------------|---------------------------------|----------------|-------------------------|
| Bach2               | -1424        | -1417      | 0.78658                         | 0.002          | GTCATGTG                |
| Duxbl1              | -332         | -322       | 0.70539                         | 3.00E-05       | TGATTCAATCA             |
| Elf3                | -553         | -541       | 0.79535                         | 2.00E-05       | AACCAGGAAATTT           |
| Fos                 | 638          | 644        | 0.81653                         | 0.00012        | TGACACA                 |
| Fos                 | -1773        | -1767      | 0.75251                         | 0.00031        | TGCCTCA                 |
| Fos                 | 601          | 607        | 0.71219                         | 0.00037        | TGAAACA                 |
| Fos                 | -1485        | -1479      | 0.70509                         | 0.00043        | TGAGTCA                 |
| Fos                 | 525          | 531        | 0.70509                         | 0.00043        | TGAGTCA                 |
| Foxa3               | -878         | -866       | 0.91544                         | 0              | AAAAAACAAACAA           |
| Hmgal               | -1291        | -1285      | 0.92027                         | 0.00012        | AAAATAA                 |
| Hmgal               | -2054        | -2048      | 0.90217                         | 0.00024        | AAAATAG                 |
| Hmgal               | -1633        | -1627      | 0.90217                         | 0.00024        | AAAATAG                 |
| Hmgal               | -1368        | -1362      | 0.86281                         | 0.00037        | AAAATTT                 |
| Hmgal               | -1343        | -1337      | 0.86281                         | 0.00037        | AAAATTT                 |
| Hmgal               | 405          | 411        | 0.86281                         | 0.00037        | AAAATTT                 |
| Hmgal               | -1062        | -1056      | 0.80959                         | 0.00061        | AAAATTG                 |
| Hmgal               | 341          | 347        | 0.80819                         | 0.00067        | TAAATAT                 |
| Hmgal               | -2059        | -2053      | 0.77308                         | 0.00079        | TAAATAA                 |
| Hmgal               | -2328        | -2322      | 0.76587                         | 0.00104        | GAAATAC                 |
| Hmgal               | -2157        | -2151      | 0.76023                         | 0.0011         | TAAATTC                 |
| Hmgal               | 703          | 709        | 0.76023                         | 0.0011         | TAAATTC                 |
| Hmgal               | -2163        | -2157      | 0.72125                         | 0.0014         | GAAATAT                 |
| Hmgal               | -1594        | -1588      | 0.70664                         | 0.00165        | AAAAAAC                 |
| Hmgal               | -1513        | -1507      | 0.70664                         | 0.00165        | AAAAAAC                 |
| Hmgal               | -878         | -872       | 0.70664                         | 0.00165        | AAAAAAC                 |
| Hmgal               | -862         | -856       | 0.70664                         | 0.00165        | AAAAAAC                 |
| Hmga2               | -1135        | -1126      | 0.92373                         | 0.00012        | CTGGAATTAA              |
| Hmga2               | -320         | -311       | 0.9079                          | 0.00021        | CAGGAAAAAA              |
| Hmga2               | -1521        | -1512      | 0.89214                         | 0.00034        | TAGCAAAAAA              |
| Hmga2               | -1986        | -1977      | 0.88168                         | 0.00045        | AACCAATAAA              |
| Hmga2               | 170          | 179        | 0.87377                         | 0.00057        | TCACAATTAT              |
| Hmga2               | 420          | 429        | 0.84749                         | 0.00108        | GCAGAATAAC              |
| Hmga2               | -1069        | -1060      | 0.84744                         | 0.00109        | AGGGAAAAAA              |
| Hmga2               | -1556        | -1547      | 0.84479                         | 0.00117        | TTGCATTAAT              |
| Hmga2               | -1349        | -1340      | 0.83955                         | 0.0013         | ATGTAAAAAA              |
| Hmga2               | -883         | -874       | 0.8343                          | 0.00145        | TTGTAAAAAA              |
| Hmga2               | 677          | 686        | 0.82907                         | 0.00159        | CATTAATTAT              |
| Hmga2               | -866         | -857       | 0.82903                         | 0.00162        | AAACAAAAAA              |
| Hmga2               | -1598        | -1589      | 0.8264                          | 0.0017         | CATGAAAAAA              |
| Hmga2               | -550         | -541       | 0.82632                         | 0.00174        | CAGGAAATTT              |
| Hmga2               | -1712        | -1703      | 0.82113                         | 0.00188        | AGGGATTAAA              |
| Hmga2               | 117          | 126        | 0.81846                         | 0.002          | GTGTATTTAT              |
| Hmga2               | 195          | 204        | 0.81591                         | 0.00204        | GTTCAATATT              |

|       |       |       |         |         |             |
|-------|-------|-------|---------|---------|-------------|
| Hmga2 | -2062 | -2053 | 0.81586 | 0.00208 | TTGTAAATAA  |
| Hmga2 | -1068 | -1059 | 0.80278 | 0.00255 | GGGAAAAAAA  |
| Hmga2 | -2166 | -2157 | 0.80271 | 0.00261 | GATGAAATAT  |
| Hmga2 | -777  | -768  | 0.80003 | 0.00276 | CCACAAATTT  |
| Hmga2 | -1545 | -1536 | 0.79488 | 0.00292 | CATTAATATA  |
| Hmga2 | 674   | 683   | 0.79219 | 0.00309 | TAACATTAAT  |
| Hmga2 | -1519 | -1510 | 0.78962 | 0.00317 | GCAAAAAAAA  |
| Hmga2 | -1295 | -1286 | 0.78955 | 0.00322 | AGGGAAAATA  |
| Hmga2 | -156  | -147  | 0.78686 | 0.00337 | ATGGATAAAA  |
| Hmga2 | -1294 | -1285 | 0.78435 | 0.00343 | GGGAAAATAA  |
| Hmga2 | -2165 | -2156 | 0.78177 | 0.00356 | ATGAAATATA  |
| Hmga2 | -2331 | -2322 | 0.78167 | 0.00362 | CCCGAAATAC  |
| Hmga2 | -1637 | -1628 | 0.78165 | 0.00364 | GAAGAAAATA  |
| Hmga2 | 621   | 630   | 0.77897 | 0.00379 | ACCCATAAAA  |
| Hmga2 | -99   | -90   | 0.7738  | 0.00403 | GTGAATTTAA  |
| Hmga2 | 312   | 321   | 0.7738  | 0.00403 | GTGAATTTAA  |
| Hmga2 | -1713 | -1704 | 0.77361 | 0.0041  | CAGGGATTAA  |
| Hmga2 | -2317 | -2308 | 0.7712  | 0.00414 | GGTTAAAAAA  |
| Hmga2 | -319  | -310  | 0.7686  | 0.00425 | AGGAAAAAAT  |
| Hmga2 | -1027 | -1018 | 0.76855 | 0.00429 | ACAGAAAAAC  |
| Hmga2 | -1548 | -1539 | 0.76854 | 0.0043  | ATTCATTAAT  |
| Hmga2 | -1518 | -1509 | 0.76596 | 0.00443 | CAAAAAAAA   |
| Hmga2 | 358   | 367   | 0.76585 | 0.00452 | AAGTATTATT  |
| Hmga2 | -2343 | -2334 | 0.76333 | 0.00459 | TTTGAATATT  |
| Hmga2 | -1241 | -1232 | 0.76319 | 0.00468 | GAAGATAAAA  |
| Hmga2 | -2110 | -2101 | 0.76088 | 0.0047  | GGGGAATAAG  |
| Hmga2 | 326   | 335   | 0.76059 | 0.00482 | CCTGATTATT  |
| Hmga2 | -490  | -481  | 0.75793 | 0.00502 | GAAGATAAAT  |
| Hmga2 | 527   | 536   | 0.7528  | 0.00523 | AGTCAATTTT  |
| Hmga2 | -1978 | -1969 | 0.75273 | 0.00528 | AATGATTTAA  |
| Hmga2 | -1418 | -1409 | 0.7527  | 0.00532 | TGGCATTTTT  |
| Hmga2 | 316   | 325   | 0.74493 | 0.00573 | ATTTAATATT  |
| Hmga2 | -549  | -540  | 0.74231 | 0.0059  | AGGAAATTTT  |
| Hmga2 | -2061 | -2052 | 0.73713 | 0.00624 | TGTAAATAAA  |
| Hmga2 | -2316 | -2307 | 0.73705 | 0.00626 | GTTAAAAAAA  |
| Hmga2 | -2313 | -2304 | 0.73704 | 0.00626 | AAAAAAAAAAA |
| Hmga2 | -2312 | -2303 | 0.73704 | 0.00626 | AAAAAAAAAAA |
| Hmga2 | -2311 | -2302 | 0.73704 | 0.00626 | AAAAAAAAAAA |
| Hmga2 | -2310 | -2301 | 0.73704 | 0.00626 | AAAAAAAAAAA |
| Hmga2 | -2309 | -2300 | 0.73704 | 0.00626 | AAAAAAAAAAA |
| Hmga2 | -2308 | -2299 | 0.73704 | 0.00626 | AAAAAAAAAAA |
| Hmga2 | -2307 | -2298 | 0.73704 | 0.00626 | AAAAAAAAAAA |
| Hmga2 | -2306 | -2297 | 0.73704 | 0.00626 | AAAAAAAAAAA |
| Hmga2 | -2305 | -2296 | 0.73704 | 0.00626 | AAAAAAAAAAA |
| Hmga2 | -2304 | -2295 | 0.73704 | 0.00626 | AAAAAAAAAAA |
| Hmga2 | -2303 | -2294 | 0.73704 | 0.00626 | AAAAAAAAAAA |

|       |       |       |         |         |              |
|-------|-------|-------|---------|---------|--------------|
| Hmga2 | -2302 | -2293 | 0.73704 | 0.00626 | AAAAAAAAAAA  |
| Hmga2 | -2301 | -2292 | 0.73704 | 0.00626 | AAAAAAAAAAA  |
| Hmga2 | -2300 | -2291 | 0.73704 | 0.00626 | AAAAAAAAAAA  |
| Hmga2 | -1517 | -1508 | 0.73704 | 0.00626 | AAAAAAAAAAA  |
| Hmga2 | -1134 | -1125 | 0.73703 | 0.00627 | TGGAATTAAT   |
| Hmga2 | -776  | -767  | 0.73703 | 0.00627 | CACAAATTTT   |
| Hmga2 | -1372 | -1363 | 0.73697 | 0.00631 | ATTCAAATTT   |
| Hmga2 | -1223 | -1214 | 0.73439 | 0.00646 | TGTGAATTTA   |
| Hmga2 | -100  | -91   | 0.73439 | 0.00646 | TGTGAATTTA   |
| Hmga2 | 311   | 320   | 0.73439 | 0.00646 | TGTGAATTTA   |
| Hmga2 | 401   | 410   | 0.73433 | 0.00652 | ACTTAAATTT   |
| Hmga2 | 290   | 299   | 0.7342  | 0.00661 | GTGGATATTT   |
| Hmga2 | -2314 | -2305 | 0.73178 | 0.00665 | TAAAAAAAAAA  |
| Hmga2 | -1370 | -1361 | 0.72916 | 0.00684 | TCAAATTTA    |
| Hmga2 | -1067 | -1058 | 0.72916 | 0.00684 | GGAAAAAAAAAT |
| Hmga2 | 338   | 347   | 0.7291  | 0.00686 | TTTTAAATAT   |
| Hmga2 | 764   | 773   | 0.7291  | 0.00687 | AGATATTTAA   |
| Hmga2 | -2058 | -2049 | 0.72907 | 0.00689 | AAATAAAATA   |
| Hmga2 | -1597 | -1588 | 0.7239  | 0.00723 | ATGAAAAAAC   |
| Hmga2 | 739   | 748   | 0.72376 | 0.00733 | TAGCATT TTC  |
| Hmga2 | 603   | 612   | 0.71854 | 0.00769 | AAACATTTAC   |
| Hmga2 | -2246 | -2237 | 0.71607 | 0.00783 | GAGGATTAAG   |
| Hmga2 | -2315 | -2306 | 0.71601 | 0.00784 | TTAAAAAAAAA  |
| Hmga2 | -1369 | -1360 | 0.71595 | 0.00787 | CAAATTTTAT   |
| Hmga2 | -1070 | -1061 | 0.7131  | 0.00817 | AAGGGAAAAA   |
| Hmga2 | -264  | -255  | 0.71065 | 0.0083  | TGGCATTATC   |
| Hmga2 | -57   | -48   | 0.71062 | 0.00834 | CGCTATAAAA   |
| Hmga2 | -1520 | -1511 | 0.70813 | 0.00847 | AGCAAAAAAA   |
| Hmga2 | -182  | -173  | 0.70809 | 0.00848 | ATTCAAT TTC  |
| Hmga2 | -1296 | -1287 | 0.70784 | 0.00865 | AAGGGAAAT    |
| Hmga2 | -1174 | -1165 | 0.70559 | 0.00868 | AAGCAATTCA   |
| Hmga2 | -1345 | -1336 | 0.70549 | 0.00871 | AAAAAATTTT   |
| Hmga2 | -1501 | -1492 | 0.70536 | 0.00879 | ATACATTTTT   |
| Hmga2 | -2162 | -2153 | 0.70535 | 0.0088  | AAATATAAAT   |
| Hmga2 | -1066 | -1057 | 0.70281 | 0.00895 | GAAAAAAATT   |
| Hmga2 | 233   | 242   | 0.70273 | 0.00902 | GTTGATTTTT   |
| Hmga2 | -2255 | -2246 | 0.70033 | 0.00913 | GTGGAATTTG   |
| Jun   | 638   | 644   | 0.81653 | 0.00012 | TGACACA      |
| Jun   | -1773 | -1767 | 0.75251 | 0.00031 | TGCCTCA      |
| Jun   | 601   | 607   | 0.71219 | 0.00037 | TGAAACA      |
| Jun   | -1485 | -1479 | 0.70509 | 0.00043 | TGAGTCA      |
| Jun   | 525   | 531   | 0.70509 | 0.00043 | TGAGTCA      |
| Meis2 | 483   | 490   | 0.7145  | 0.00017 | ATGACAGA     |
| Meis3 | 483   | 490   | 0.79932 | 0.00023 | ATGACAGA     |
| Meis3 | -1832 | -1825 | 0.74258 | 0.00041 | GTGACACC     |
| Meox2 | 269   | 278   | 0.74022 | 0.00026 | GGTAATCATT   |



|        |       |       |         |          |                 |
|--------|-------|-------|---------|----------|-----------------|
| Meox2  | 678   | 687   | 0.73638 | 0.00027  | ATTAATTATG      |
| Mzfl   | -2111 | -2106 | 1       | 0        | TGGGGA          |
| Mzfl   | -203  | -198  | 1       | 0        | TGGGGA          |
| Mzfl   | 179   | 184   | 1       | 0        | TGGGGA          |
| Mzfl   | 446   | 451   | 0.90234 | 0.00049  | GGGGGA          |
| Nkx6-2 | -1547 | -1540 | 0.88737 | 0.00017  | TTCATTAA        |
| Nkx6-2 | 679   | 686   | 0.81497 | 0.00034  | TTAATTAT        |
| Nkx6-2 | 172   | 179   | 0.76493 | 0.00055  | ACAATTAT        |
| Pou5fl | -2315 | -2301 | 0.77552 | 0        | TTAAAAAAAAAAAAA |
| Rxra   | -238  | -228  | 0.68566 | 2.00E-03 | ACTGACCTTGG     |
| Snail  | 482   | 491   | 0.87532 | 0.00012  | CATGACAGAT      |
| Snail  | -1833 | -1824 | 0.75861 | 0.00054  | GGTGACACCT      |
| Sox10  | -1428 | -1423 | 1       | 0        | CTTTGT          |
| Sox10  | -1476 | -1471 | 0.96781 | 0.00024  | CATTGT          |
| Sox10  | 798   | 803   | 0.96781 | 0.00024  | CATTGT          |
| Sox10  | -103  | -98   | 0.79138 | 0.00049  | CTGTGT          |
| Sox10  | 465   | 470   | 0.79138 | 0.00049  | CTGTGT          |
| Sox10  | -1249 | -1244 | 0.7592  | 0.00122  | CAGTGT          |
| Sox10  | -459  | -454  | 0.7592  | 0.00122  | CAGTGT          |
| Sox10  | -1884 | -1879 | 0.73398 | 0.00146  | TTTTGT          |
| Sox10  | -1432 | -1427 | 0.73398 | 0.00146  | CTTTCT          |
| Sox10  | -1357 | -1352 | 0.73398 | 0.00146  | TTTTGT          |
| Sox10  | -298  | -293  | 0.73398 | 0.00146  | TTTTGT          |
| Sox10  | 513   | 518   | 0.73398 | 0.00146  | CTTTCT          |
| Sox10  | 657   | 662   | 0.73398 | 0.00146  | TTTTGT          |
| Sox10  | 668   | 673   | 0.73398 | 0.00146  | TTTTGT          |
| Sox10  | -2337 | -2332 | 0.7018  | 0.00195  | TATTGT          |
| Sox10  | -1607 | -1602 | 0.7018  | 0.00195  | TATTGT          |
| Sox10  | -936  | -931  | 0.7018  | 0.00195  | CATTCT          |
| Sox10  | -656  | -651  | 0.7018  | 0.00195  | TATTGT          |
| Sox6   | -1608 | -1599 | 0.70823 | 9.00E-05 | TTATTGTTCT      |
| Sp110  | -2268 | -2260 | 0.8824  | 0.00057  | CTAAGGGAG       |
| Sp110  | -1298 | -1290 | 0.85887 | 0.00095  | GTAAGGGAA       |
| Sp110  | -1715 | -1707 | 0.85382 | 0.00104  | AGCAGGGAT       |
| Sp110  | -1072 | -1064 | 0.84882 | 0.00111  | ACAAGGGAA       |
| Sp110  | -1401 | -1393 | 0.82865 | 0.00142  | TAAAGGGAA       |
| Sp110  | -1096 | -1088 | 0.81678 | 0.00169  | TGTAGGGCT       |
| Sp110  | -1217 | -1209 | 0.80166 | 0.002    | TTAGGGGT        |
| Sp110  | -1396 | -1388 | 0.79666 | 0.00209  | GGAAGGGCA       |
| Sp110  | -51   | -43   | 0.78835 | 0.00222  | AAAAGGGAA       |
| Sp110  | -2128 | -2120 | 0.78664 | 0.00225  | ATAAGGGAC       |
| Sp110  | 442   | 450   | 0.7614  | 0.00268  | CAAAGGGGG       |
| Sp110  | -2113 | -2105 | 0.72088 | 0.00348  | GTTGGGGAA       |
| Spib   | -2220 | -2214 | 1       | 0        | AGAGGAA         |
| Spib   | 411   | 417   | 0.93084 | 0.00012  | TGAGGAA         |
| Spib   | -1641 | -1635 | 0.83823 | 0.00043  | TCAGGAA         |

|         |       |       |         |          |             |
|---------|-------|-------|---------|----------|-------------|
| Spib    | 615   | 621   | 0.83823 | 0.00043  | TCAGGAA     |
| Spib    | -2111 | -2105 | 0.77438 | 0.00055  | TGGGGAA     |
| Tbx1    | -1010 | -1000 | 0.69139 | 2.00E-05 | ATGTGTGAAGT |
| Tbx1    | -103  | -93   | 0.66422 | 8.00E-05 | CTGTGTGAATT |
| Tbx3    | -1118 | -1109 | 0.79918 | 0.00016  | GATGTGTCAA  |
| Tbx3    | -1011 | -1002 | 0.79631 | 0.00016  | GATGTGTGAA  |
| Tead3   | -708  | -701  | 0.95172 | 3.00E-05 | ACATTCCT    |
| Zfp202  | 177   | 186   | 0.81687 | 0.00034  | TATGGGGAGA  |
| Zfp202  | 442   | 451   | 0.74741 | 0.00095  | CAAAGGGGGA  |
| Zfp202  | -1305 | -1296 | 0.72466 | 0.00128  | ATTTGGGGTA  |
| Zfp354c | -2190 | -2185 | 0.97814 | 0.00024  | GTGGAG      |
| Zfp354c | 64    | 69    | 0.97814 | 0.00024  | GTGGAG      |
| Zfp354c | 149   | 154   | 0.88    | 0.00049  | GTGGAC      |
| Zfp354c | 290   | 295   | 1       | 0.002    | GTGGAT      |
| Zfp637  | 120   | 128   | 0.71756 | 0.00016  | TATTTATGT   |
| Zscan4c | 128   | 136   | 0.76087 | 0.00047  | TGTGTGTAT   |
| Zscan4c | 114   | 122   | 0.75467 | 5.00E-04 | TATGTGTAT   |
| Zscan4c | -1883 | -1875 | 0.70051 | 0.00081  | TTTGTGCTT   |

**Table S4. List of primers used for qPCR**

| <b>Gene</b>          | <b>Direction</b> | <b>Sequence 5'-3'</b>               |
|----------------------|------------------|-------------------------------------|
| <i>18S</i>           | forward          | TGCGGCTTAATTTGACT                   |
| <i>18S</i>           | reverse          | ATCAATCTGTCAATCCTGTC                |
| <i>Actin</i>         | forward          | GATCAAGATCATTGCTCCTCCTG             |
| <i>Actin</i>         | reverse          | AGGGTGTAACGCAGCTCA                  |
| <i>B020004J07RIK</i> | forward          | TGACAGATGGAAAGATAGGTGCTGC           |
| <i>B020004J07RIK</i> | reverse          | ACAAAGATGAGCTGGGAGCACTGG            |
| <i>Cml2</i>          | forward          | AGAGCCAGAAGTCTCCCAT                 |
| <i>Cml2</i>          | reverse          | TCATGCCGCTGGAGAACAAT                |
| <i>Dux</i>           | forward          | CCTCGATCCCTAGCATCTGG                |
| <i>Dux</i>           | reverse          | CAAAAGCTCTCCCACGAACC                |
| <i>Duxbl1</i>        | forward          | GAAGCTTTTGAGAAGAATCGG               |
| <i>Duxbl1</i>        | reverse          | GGGTGGATGAGGAGTTTTCT                |
| <i>Eif1a</i>         | forward          | TGGGAGACATAGGCAAGAGG                |
| <i>Eif1a</i>         | reverse          | CTTTGCAGTTCCTGCATTGA                |
| <i>Gapdh</i>         | forward          | AATGGTGAAGGTCGGTGTG                 |
| <i>Gapdh</i>         | reverse          | GAAGATGGTGATGGGCTCC                 |
| <i>Gm12794</i>       | forward          | TGCTGCCAAATTCCTTTCTC                |
| <i>Gm12794</i>       | reverse          | GAGAGTTGGCAGCGATTCAT                |
| <i>Gm16367</i>       | forward          | AGGGCCCTCAAAGTCAAGT                 |
| <i>Gm16367</i>       | reverse          | CAGCAGGAAAAGGAATCCAA                |
| <i>Gm4340</i>        | forward          | TGGCTGCCGACTGTACCTTG                |
| <i>Gm4340</i>        | reverse          | GTCATGACGTCTTTGCTGGA                |
| <i>Nanog</i>         | forward          | AACCAGTGGTTGAAGACTAGCAATGGTC        |
| <i>Nanog</i>         | reverse          | TTCCAGATGCGTTCACCAGATAGC            |
| <i>Oct3/4</i>        | forward          | CCGTGTGAGGTGGAGTCTGGA               |
| <i>Oct3/4</i>        | reverse          | CGCCGGTTACAGAACCATACTCG             |
| <i>Sp110</i>         | forward          | GCACAGCACGAAGAACCACAC               |
| <i>Sp110</i>         | reverse          | GGCCTTACCACAGGTCACAG                |
| <i>Stra8</i>         | forward          | GAGGCCCAGCATATGTCTAAC               |
| <i>Stra8</i>         | reverse          | GCTCTGGTTCCTGGTTAATG                |
| <i>Tcstv1</i>        | forward          | ATCCTCAGGAACTGAGAACTTCTGG           |
| <i>Tcstv1</i>        | reverse          | ATCCATTTCGGCAATCCAGC                |
| <i>Tcstv3</i>        | forward          | TCTCCAGCTGTTGTGGAATAAGTTCAAC        |
| <i>Tcstv3</i>        | reverse          | CTTCTGGCTTTATCCATGGATCCCTGAAGGTAATC |
| <i>Zscan4</i>        | forward          | AGTCTGACTGATGAGTGCTTGAAGCC          |
| <i>Zscan4</i>        | reverse          | GGCCTTGTTCAGATTGCTGTTG              |
